# Supplementary material for: Improving Ground-Level NO 2 Estimation in China Using GEMS Measurements and a Nested Machine Learning Model
Source: Copernicus journal article supplement (doi:10.5194/egusphere-2024-558), 2024-03-13
Supplement: Supplementary file 1 [file egusphere-2024-558-supplement.pdf]

## Supplementary Material

# Improving Ground-Level NO<sub>2</sub> Estimation in China Using GEMS Measurements and a Nested Machine Learning Model

Naveed Ahmad<sup>1</sup>, Changqing Lin<sup>1,\*</sup>, Alexis K.H. Lau,<sup>1,2</sup> Jhoon Kim<sup>3</sup>, Fangqun Yu<sup>4</sup>, Chengcai Li<sup>5</sup>, Ying Li<sup>6</sup>, Jimmy C.H. Fung<sup>1,7</sup>, Xiang Qian Lao<sup>8</sup>

<sup>1</sup>Division of Environment and Sustainability, The Hong Kong University of Science and Technology, Clear Water Bay, Hong Kong, China

<sup>2</sup>Department of Civil and Environmental Engineering, The Hong Kong University of Science and Technology, Clear Water Bay, Hong Kong, China

<sup>3</sup>Department of Atmospheric Sciences, Yonsei University, Seoul, 03722, Korea

<sup>4</sup>Atmospheric Sciences Research Center, State University of New York at Albany, Albany, NY 12226, US

<sup>5</sup>Department of Atmospheric and Oceanic Sciences, School of Physics, Peking University, Beijing 100871, China

<sup>6</sup>Department of Ocean Science and Engineering, Southern University of Science and Technology, Shenzhen 518055, China

<sup>7</sup>Department of Mathematics, The Hong Kong University of Science and Technology, Clear Water Bay, Hong Kong, China

<sup>8</sup>Department of Biomedical Sciences, City University of Hong Kong, Hong Kong SAR, China

*Correspondence to:* Changqing Lin (cqclin@ust.hk)

It includes Text S1 and Figs. S1-S6

**Text S1: Hourly, seasonal, and annual correction factors**

There was some missing data for satellite NO<sub>2</sub> VCDs measurements due to cloudy conditions between 08:00 AM and 03:00 PM for 2021. Therefore, we applied the correction factors, which represent the ratio between the average NO<sub>2</sub> from all ground measurements and the average ground-level NO<sub>2</sub> when satellite data was available (Eq. S1). These correction factors were used to obtain a bias-corrected estimation of satellite-derived ground-level NO<sub>2</sub> concentrations for each hour from 08:00 AM to 03:00 PM.

$$C_{fk} = \frac{\frac{1}{m} \sum_{i=1}^m C_{gNO_2i}}{\frac{1}{n} \sum_{i=1}^n C_{gNO_2i}} \quad (S1)$$

Here,  $C_f$  represents the correction factor for hour  $k$  (each hour from 08:00 AM to 03:00 PM),  $C_g$  presents ground-measured NO<sub>2</sub> concentrations,  $m$  shows all ground observations of NO<sub>2</sub>, and  $n$  corresponds to ground observations of NO<sub>2</sub> at hours when the satellite data were available. The station-based spatial distributions of correction factors for each hour from 08:00 AM to 03:00 PM are revealed in Fig. S4. As the predicted NO<sub>2</sub> concentrations in the study region were on a regular grid of  $0.2^\circ \times 0.4^\circ$ , the bilinear interpolation was applied to map the correction factors on the same regular grid of  $0.2^\circ \times 0.4^\circ$  (Fig. S5). The bias-corrected ground-level NO<sub>2</sub> concentrations for each hour from 08:00 AM to 03:00 PM were then estimated using Eq. S2.

$$C_{NO_2} = C_{pNO_2} \times C_f \quad (S2)$$

where,  $C_{NO_2}$  represents the corrected satellite-estimated ground-level NO<sub>2</sub> concentrations,  $C_{pNO_2}$  are initial predicted NO<sub>2</sub> concentrations, and  $C_f$  is correction factor for each hour from 08:00 AM to 03:00 PM.

Further, as the satellite data was available only during the daytime from 08:00 AM to 03:00 PM, and besides missing data because of clouds, there was also missing satellite data for nighttime and other hours of the day beyond 08:00 AM and 03:00 PM. Therefore, for seasonal correction factors, we used the seasonal average of all available ground-measured NO<sub>2</sub> concentrations for 24 hours and the seasonal average of ground-measured NO<sub>2</sub> when the satellite data was available. Subsequently, Eq. S1 was used to calculate the correction factors for each season separately (i.e., spring, summer, fall, and winter). Similarly, to obtain the annual correction factor, we estimated the annual average of all available ground-measured NO<sub>2</sub> concentrations for 24 hours and the annual average of ground-measured NO<sub>2</sub> when the satellite data was available. The spatial distributions of station-based and interpolated seasonal and annual correction factors are shown in Figs. S2 and S3. Then, Eq. S2 was used for the bias correction of seasonal and annual ground-level NO<sub>2</sub> concentrations.

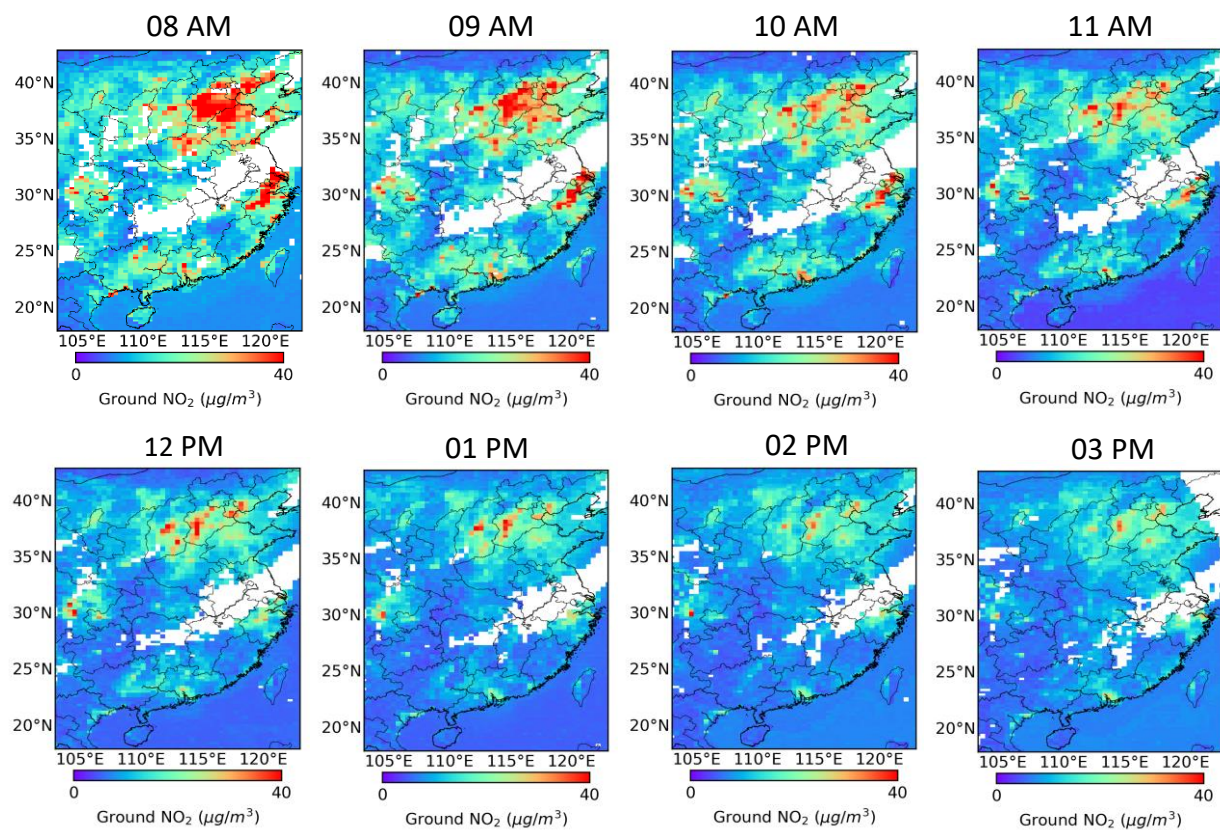

**Figure S1: Spatial distributions of satellite-derived hourly ground-level NO<sub>2</sub> concentrations on 29<sup>th</sup> September 2021 for each hour from 08:00 AM to 03:00 PM (UTC+8).**

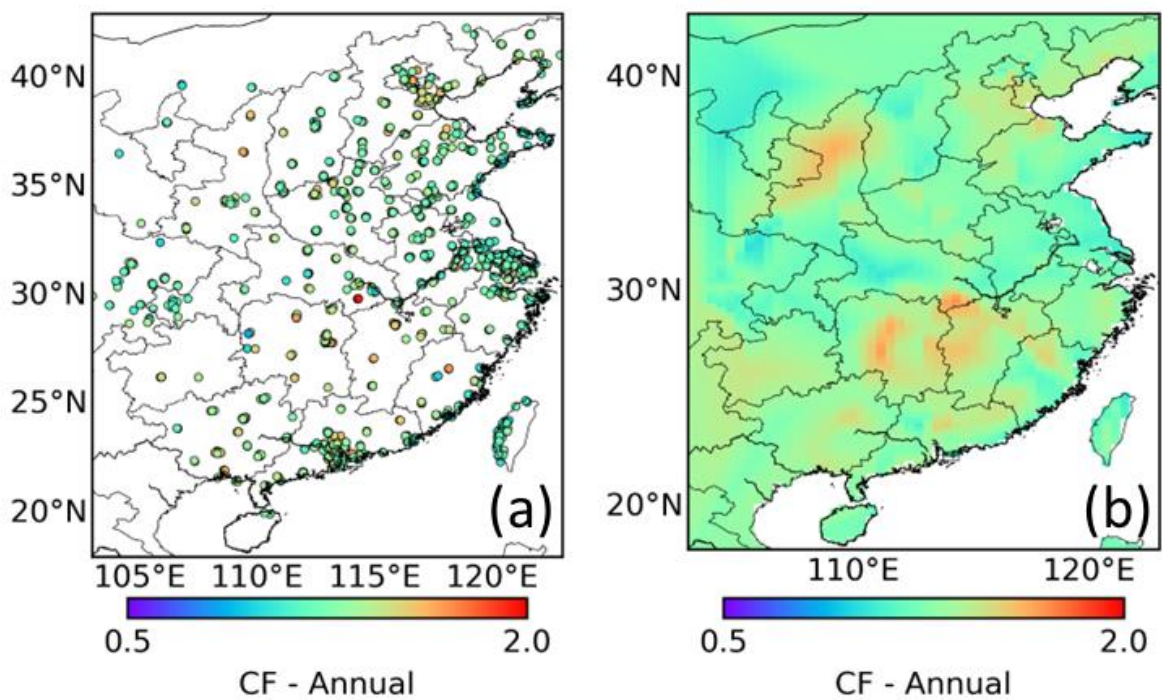

Figure S2: Spatial distribution of (a) station-based and (b) interpolated correction factors for estimating annual mean NO<sub>2</sub> concentration for 2021.

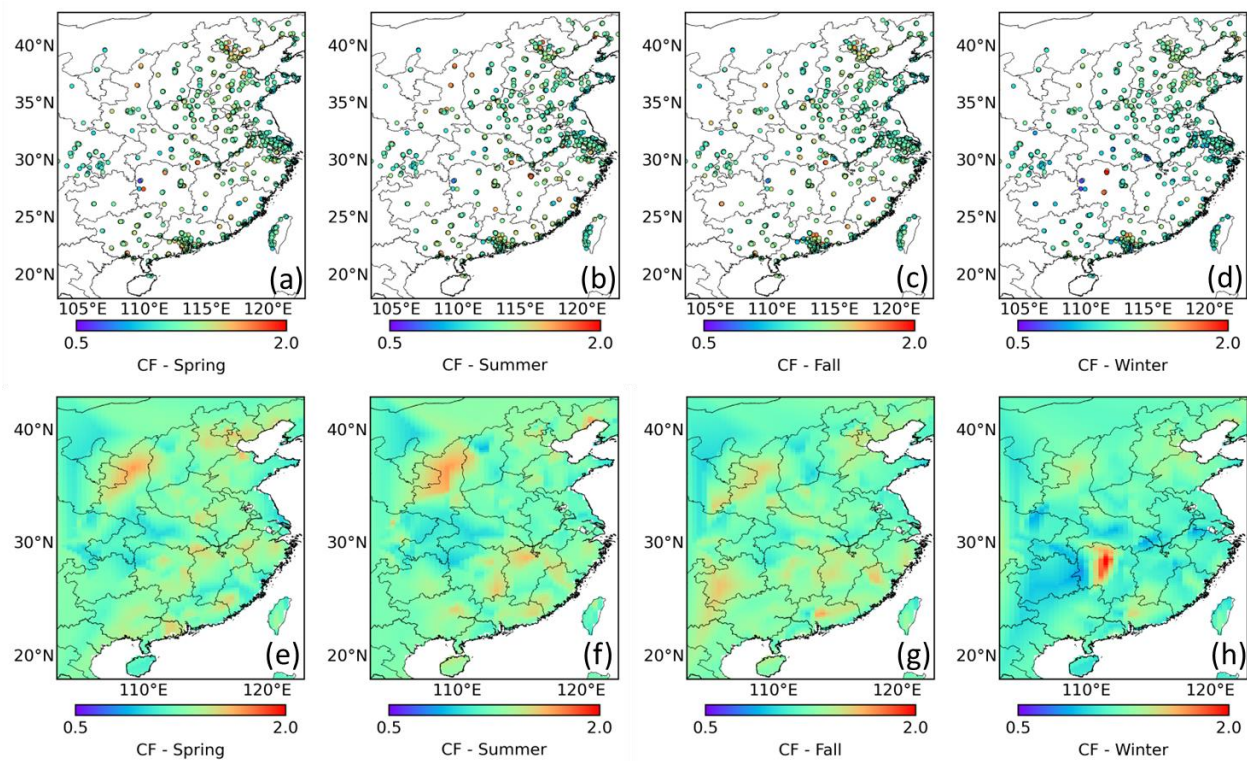

**Figure S3: Spatial distributions of (a-d) station-based and (e-h) interpolated correction factors for estimating seasonal mean of  $\text{NO}_2$  concentration for 2021.**

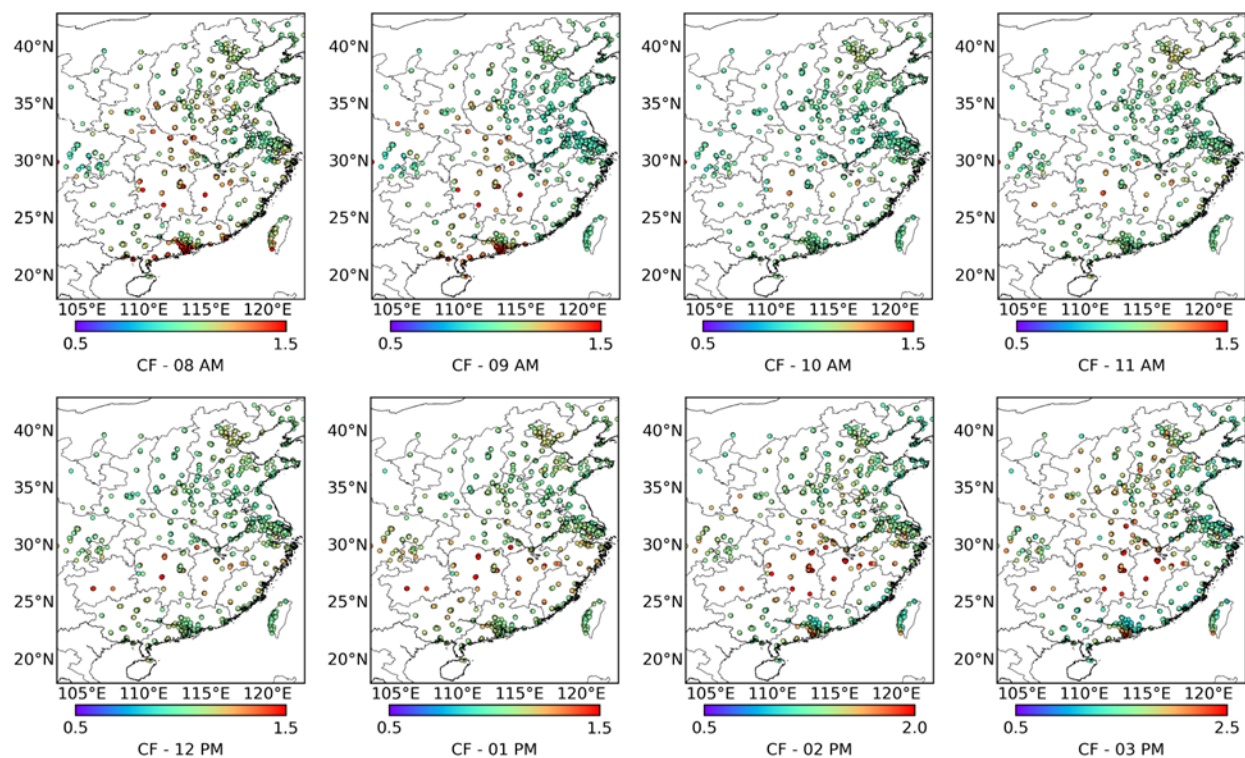

**Figure S4: Spatial distributions of station-based correction factor between 08:00 AM and 03:00 PM (UTC+8) for 2021.**

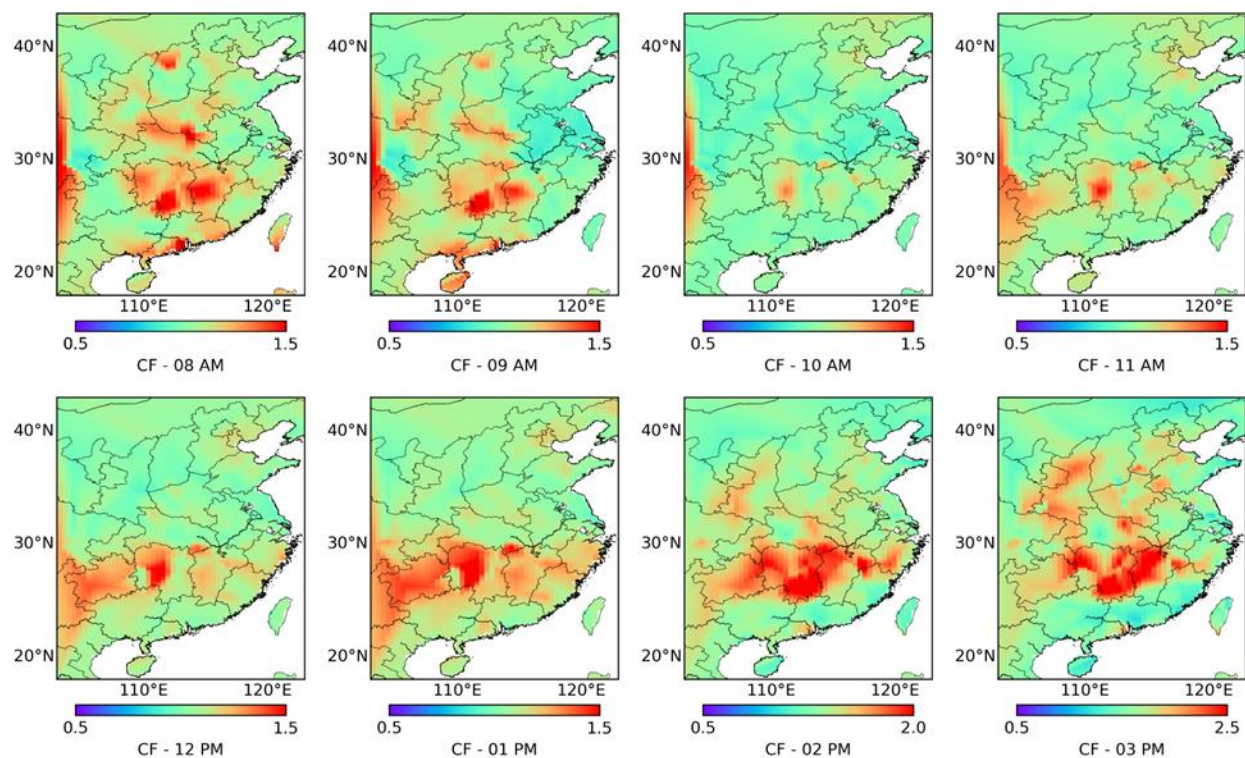

**Figure S5: Spatial distributions of interpolated correction factor from individual hours between 08:00 AM and 03:00 PM (UTC+8) for 2021.**

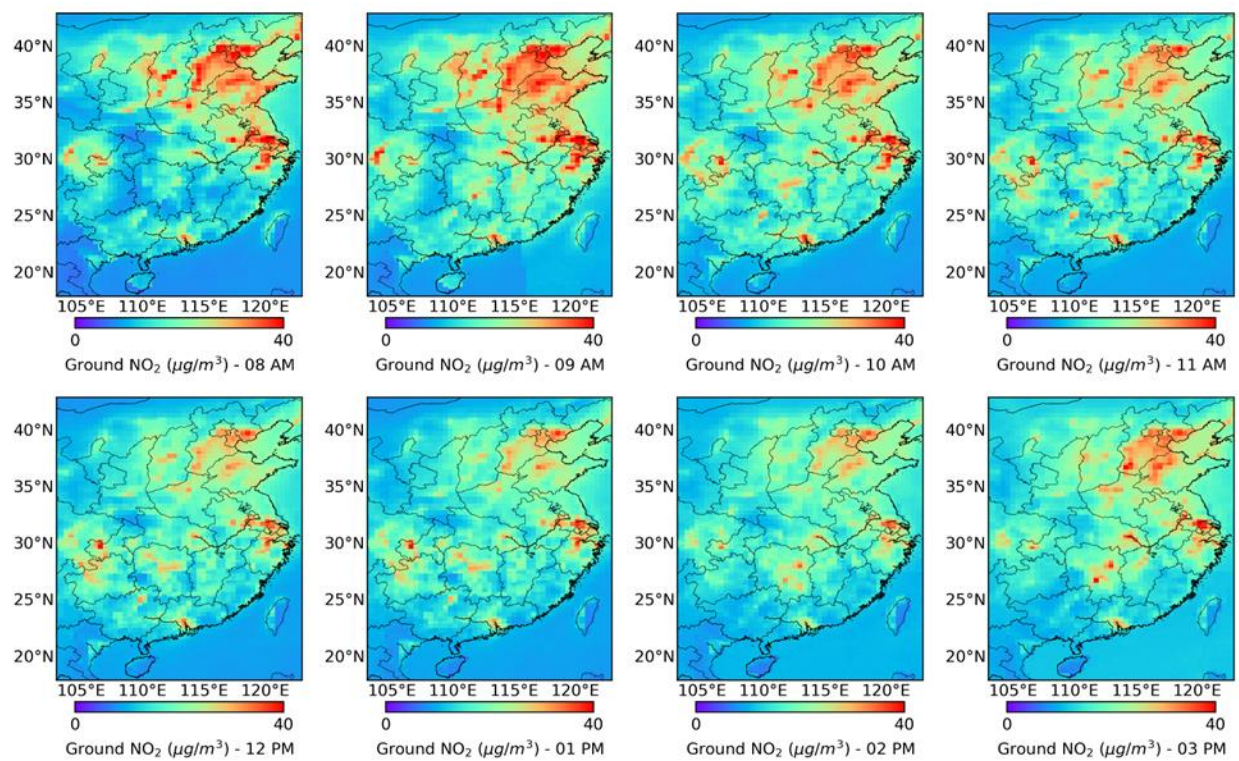

**Figure S6: Spatial distributions of average of the ground-level  $\text{NO}_2$  concentrations for each hour between 08:00 AM and 03:00 PM (UTC+8) for 2021.**
